# Supplementary material for: IL-15 signaling promotes adoptive effector T-cell survival and memory formation in irradiation-induced lymphopenia
Source: PubMed Central journal article supplement (PMC4858849; doi:10.1186/s13578-016-0098-2), 2016-05-06

# Supplementary Figure 1

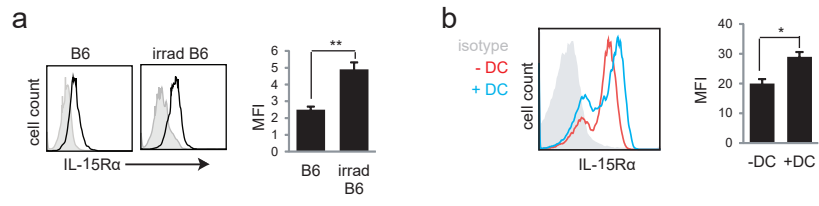

Supplement: 13578_2016_98_MOESM1_ESM.pdf [file 13578_2016_98_MOESM1_ESM.pdf]
